# Supplementary material
Source: MDPI journal article supplement (https://www.mdpi.com/2073-4441/15/16/2993)
Supplement: s1 [file water-2540904-supplementary.pdf › water-2540904-supplementary.pdf]

**Table S1.** Main risk factors and their distribution states of accident A.

| First grade index | Second grade index           | Description                                                                                                                                                                                                           | Distribution state                                            |
|-------------------|------------------------------|-----------------------------------------------------------------------------------------------------------------------------------------------------------------------------------------------------------------------|---------------------------------------------------------------|
| Person (S1)       | Driver factor (X1)           | Speeding, fatigue driving, operational errors, negligence, and other violations.                                                                                                                                      | Good condition (0), bad condition (1)                         |
|                   | Escort factor (X2)           | Resignation without authorization, negligence, illegal operation, and inadequate supervision.                                                                                                                         | Good condition (0), bad condition (1)                         |
| Vehicle (S2)      | Vehicle emergent factor (X3) | Tire burst, brake failure, tank uncoupling, vehicle spontaneous combustion, and tire fire.                                                                                                                            | Good (0), breakdown (1)                                       |
|                   | Vehicle wear factor (X4)     | Mechanical failure of other vehicles.                                                                                                                                                                                 | Good condition (0), bad condition (1)                         |
| Tank (S3)         | Tank emergent factor (X5)    | Tank body rupture, safety valve leakage, and valve failure.                                                                                                                                                           | Good condition (0), bad condition (1)                         |
|                   | Tank wear factor (X6)        | Aging and disrepair of tanks and safety accessories.                                                                                                                                                                  | Good condition (0), bad condition (1)                         |
| Environment (S4)  | Weather factor (X7)          | The road surface was slippery in rainy and snowy weather; the visibility was low in foggy weather; the exposure of dangerous goods leaked in high temperature; the tank ruptured in low temperature and cold weather. | Sunny (0), other (1)                                          |
|                   | Road factor (X8)             | Poor smoothness, wet and slippery, unreasonable road alignment, no signal at intersection, steep slopes and sharp turns.                                                                                              | Flat (0), other (1)                                           |
|                   | Time factor (X9)             | Driving time was 18:00-06:00 at night.                                                                                                                                                                                | Time 06:00-18:00 (0), Time 18:00-06:00 (1)                    |
|                   | Lighting factor (X10)        | No lighting equipment in the traffic section.                                                                                                                                                                         | Street lighting at night (0), no street lighting at night (1) |

**Note:** Accident A referred to the dangerous goods transportation accident on the cross-tributary bridges of Baiyangdian Lake.

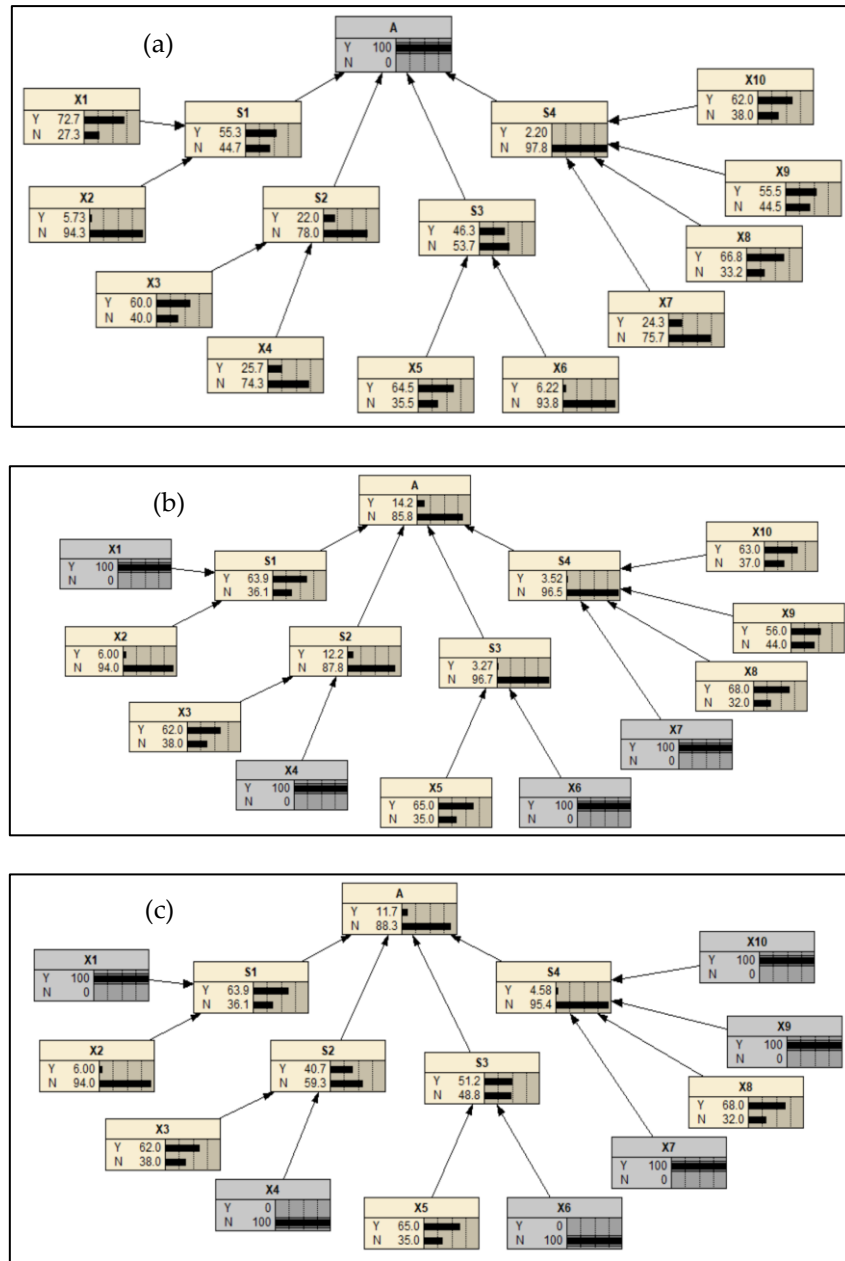

**Figure S1.** (a) Bayesian diagnosis reasoning results of dangerous goods transportation accidents 1 (b) Bayesian diagnosis reasoning results of dangerous goods transportation accidents 2 (c) Bayesian diagnosis reasoning results of dangerous goods transportation accidents 3.
